# Supplementary material for: Environmental Impacts of High-Quality Brazilian Beef Production: A Comparative Life Cycle Assessment of Premium and Super-Premium Beef
Source: MDPI journal article supplement (doi:10.3390/ani13223578), 2023-11-20
Supplement: s1 [file s1]

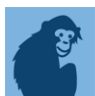

---

*Supplementary Material*

# **Environmental Impacts of High-Quality Brazilian Beef Production: A Comparative Life Cycle Assessment of Premium and Super-Premium Beef**

**Henrique Biasotto Morais<sup>1,\*</sup>, Luis Artur Loyola Chardulo<sup>1,2</sup>, Welder Angelo Baldassini<sup>1,2</sup>, Isabella Cristina de Castro Lippi<sup>2</sup>, Gabriela Belinassi Orsi<sup>2</sup> and Clandio Favarini Ruviaro<sup>3</sup>**

<sup>1</sup> UNESP – FCAV, Jaboticabal-SP, Brazil

<sup>2</sup> UNESP – FMVZ, Botucatu-SP, Brazil

<sup>3</sup> UFGD - FCA, Dourados-MS, Brazil

\* Correspondence: [biasotto.morais@unesp.br](mailto:biasotto.morais@unesp.br); Tel.: +55(19)991147207

| Equation                  |                                                                                                       | Emission factors and others |               |       |
|---------------------------|-------------------------------------------------------------------------------------------------------|-----------------------------|---------------|-------|
|                           |                                                                                                       | Constants                   |               |       |
| Enteric methane emissions |                                                                                                       |                             |               |       |
| 10.3                      | Maintenance (NEm)                                                                                     | Cfi                         |               |       |
| Chapter 10 IPCC 2006      | NEm = Cfi • (Weight)^0.75                                                                             |                             | adult female  |       |
|                           |                                                                                                       | 0.322                       | non-lactating |       |
|                           |                                                                                                       | 0.37                        | adult male    |       |
| 10.6                      | Growth (NEg)                                                                                          | C                           |               |       |
| Chapter 10 IPCC 2006      | NEg = 22,02*(BW/C*MW)^0,75 * WG^1,097                                                                 | 0.8                         | female        |       |
|                           |                                                                                                       | 1.0                         | male          |       |
|                           |                                                                                                       |                             |               |       |
| 10.14                     | Ratio of net energy available in diet for                                                             |                             |               |       |
| Chapter 10 IPCC 2006      | maintenance to digestible energy consumed (REm)                                                       |                             |               |       |
|                           | REm = 1,123-(4,092*10^-3*DE%)+(1,126*10^-5*(DE%^2))-25,4/DE%                                          |                             |               |       |
|                           |                                                                                                       |                             |               |       |
| 10.15                     | Ratio of net energy available for growth in                                                           |                             |               |       |
| Chapter 10 IPCC 2006      | a diet to digestible energy consumed (REG)                                                            |                             |               |       |
|                           | REG = 1,164-(5,16*10^-3*DE%)+(1,308*10^-5*DE%^2)-(37,4/DE%)                                           |                             |               |       |
|                           |                                                                                                       |                             |               |       |
| 10.16                     | Gross Energy (GE)                                                                                     |                             |               |       |
| Chapter 10 IPCC 2006      | GE = (NEm/REM + NEg/REG)/(DE%/100)                                                                    |                             |               |       |
| 10.17                     | Dry matter intake: (DMI)                                                                              |                             |               |       |
| Chapter 10 IPCC 2006      | DMI = BW^0,75*(0,2444*NEm <sub>a</sub> -0.0111*NEm <sub>a</sub> <sup>2</sup> -0,472)/NEm <sub>a</sub> |                             |               |       |
|                           | NEm <sub>a</sub> = REM x 18.45 x DE% / 100                                                            |                             |               |       |
|                           |                                                                                                       |                             |               |       |
| 10.21                     | CH4 emission factors for enteric fermentation                                                         |                             |               |       |
| Chapter 10 IPCC 2006      | from a livestock category: (EF)                                                                       | Ym                          |               |       |
|                           | EF = (GE*Ym*days)/55,65 MJ/kg CH4)                                                                    | 0.05                        |               |       |
|                           |                                                                                                       |                             |               |       |
| manure management         |                                                                                                       |                             |               |       |
| 10.22                     | CH4 emissions from manure management, for a defined population                                        |                             |               |       |
| Chapter 10 IPCC 2006      | CH4Manure = EF(T)*N(T)/10^6                                                                           |                             |               |       |
| 10.23                     | annual CH4 emission factor for livestock category (EF)                                                | MS(T,S,k)                   | MCFsk         | Bo(T) |
| Chapter 10 IPCC 2006      |                                                                                                       | 0.99                        | 1.5           | 0.1   |
| 10.24                     | volatile solid excretion per day on a dry-organic matter basis                                        | UE                          |               |       |
| Chapter 10 IPCC 2006      | VS = GE*(1-DE/100)+(UE*GE)*(1-ASH/18.45)                                                              | 0.04                        |               |       |
| 10.25                     | Direct N2O emissions from manure management                                                           | MS(T,S)                     | EF³(S)        |       |

---

|                      |  |      |      |
|----------------------|--|------|------|
| Chapter 10 IPCC 2006 |  | 0.99 | 0.02 |
|----------------------|--|------|------|

  

|                      |                                                 |          |  |
|----------------------|-------------------------------------------------|----------|--|
| 10.30                | annual N excretion for livestock category       | Nrate(T) |  |
| Chapter 10 IPCC 2006 | $Nex(T) = Nrate(T) * TAM(T)/1000 * \text{days}$ | 0.36     |  |

---
